# Supplementary material for: Novel Susceptibility Genes Drive Familial Non-Medullary Thyroid Cancer in a Large Consanguineous Kindred
Source: MDPI journal article supplement (doi:10.3390/ijms24098233), 2023-05-04
Supplement: s1 [file s1]

## Supplementary-

**Supplementary Table S1: List of the genes reported to have mutations causing familial non-medullary thyroid cancer.**

| Gene                                                                                       | Protein                                                          | OMIM   | Reference |
|--------------------------------------------------------------------------------------------|------------------------------------------------------------------|--------|-----------|
| <b>ANXA3</b>                                                                               | Annexin A3                                                       | 106490 | 1         |
| <b>ATM</b>                                                                                 | Ataxia Telangiectasia Mutated                                    | 607585 | 2         |
| <b>BRCA1</b>                                                                               | Breast cancer type 1 susceptibility protein                      | 113705 | 2         |
| <b>CHEK2</b>                                                                               | Checkpoint Kinase 2                                              | 604373 | 2,3       |
| <b>CIAO3</b>                                                                               | Cytosolic Iron-Sulfur Assembly Component 3                       | 611118 | 4         |
| <b>DICER1</b>                                                                              | Endoribonuclease Dicer                                           | 606241 | 2,4       |
| <b>EIF1AX</b>                                                                              | Eukaryotic Translation Initiation Factor 1A X-Linked             | 300186 | 3         |
| <b>FKBP10</b>                                                                              | Peptidyl-prolyl cis-trans isomerase                              | 607063 | 1         |
| <b>FOXE1</b>                                                                               | Forkhead box protein E1                                          | 602617 | 2,4       |
| <b>HABP2</b>                                                                               | Hyaluronan Binding Protein 2                                     | 603924 | 2,4,5     |
| <b>MYH9</b>                                                                                | Myosin Heavy Chain 9                                             | 160775 | 2         |
| <b>NKX2.1</b>                                                                              | Homeobox protein Nkx-2.1                                         | 600635 | 2,4,6     |
| <b>NMTC1</b>                                                                               | Non-medullary thyroid carcinoma 1                                | 606240 | 4         |
| <b>NTN4</b>                                                                                | Netrin 4                                                         | 610401 | 1         |
| <b>P2RX5</b>                                                                               | Purinergic Receptor P2X 5                                        | 602836 | 1         |
| <b>PLEKHG5</b>                                                                             | Pleckstrin Homology And RhoGEF Domain Containing G5              | 611101 | 1         |
| <b>PPM1D</b>                                                                               | Protein Phosphatase, Mg2+/Mn2+ Dependent 1D                      | 605100 | 3         |
| <b>PTCSC2</b>                                                                              | Papillary Thyroid Carcinoma Susceptibility Candidate 2           | 44086* | 2         |
| <b>PTCSC3</b>                                                                              | Papillary Thyroid Carcinoma Susceptibility Candidate 3           | 614821 | 2         |
| <b>RASAL1</b>                                                                              | RAS Protein Activator Like 1                                     | 604118 | 2         |
| <b>SAPCD1</b>                                                                              | Suppressor APC Domain Containing 1                               | 13938* | 1         |
| <b>SERPINA1</b>                                                                            | Serpin Family A Member 1                                         | 107400 | 1         |
| <b>SLC34A2</b>                                                                             | Solute Carrier Family 34 Member 2                                | 604217 | 7         |
| <b>SPRY4</b>                                                                               | Sprouty RTK Signaling Antagonist 4                               | 607984 | 8         |
| <b>SRGAP1</b>                                                                              | SLIT-ROBO Rho GTPase Activating Protein 1                        | 606523 | 2,4       |
| <b>SRRM2</b>                                                                               | Serine/Arginine Repetitive Matrix 2                              | 606032 | 2,9       |
| <b>TCO</b>                                                                                 | Thyroid carcinoma, non-medullary, with cell oxyphilia            | 603386 | 4         |
| <b>TRPM3</b>                                                                               | Transient Receptor Potential Cation Channel Subfamily M Member 3 | 608961 | 6         |
| <b>WDR77</b>                                                                               | WD Repeat Domain 77                                              | 611734 | 10        |
| <b>XRCC1</b>                                                                               | X-Ray Repair Cross Complementing 1                               | 194360 | 2         |
| <b>OMIM: Online Mendelian Inheritance in Man. *HUGO Gene Nomenclature Committee (HGNC)</b> |                                                                  |        |           |

**Supplementary Table S2: Family segregation analysis of the 50 negated candidate variants while comparing exome sequencing of patients – III8, III10, IVA5, XFIII4, and XFIII5.**

| Gene<br>Symbol  | Position        | Ref/Alt | III1<br>A | III2<br>H | III4<br>H | III5<br>A | III6<br>H | III8<br>A | III10<br>A | IVA5<br>A | XFIII1<br>A | XFIII4<br>A | XFIII5<br>A |
|-----------------|-----------------|---------|-----------|-----------|-----------|-----------|-----------|-----------|------------|-----------|-------------|-------------|-------------|
| <i>MSH6</i>     | chr2:48033423   | A>T     | -/+       | +/+       | +/+       | -/+       | -/-       | -/+       | -/+        | -/+       | -           | +/+         | +/+         |
| <i>LATS1</i>    | chr6:150023177  | A>G     | +/+       | -         | -         | +/+       | -         | -/+       | -/+        | -/+       | -           | +/+         | +/+         |
| <i>ITGAX</i>    | chr16:31388180  | G>A     | -/+       | +/+       | +/+       | +/+       | +/+       | -/+       | -/+        | -/+       | -           | +/+         | +/+         |
| <i>GNAS</i>     | chr20:57429715  | A>C     | -         | -         | -         | +/+       | -         | +/+       | +/+        | +/+       | -           | +/+         | +/+         |
| <i>F7</i>       | chr13:113772751 | A/G     | -/+       | -/+       | -/+       | -/+       | +/+       | -/+       | -/+        | -/+       | -           | +/+         | -/+         |
| <i>ATM</i>      | chr11:108172382 | G/C     | -/+       | -         | -         | +/+       | -         | -/+       | -/+        | -/+       | -           | +/+         | +/+         |
| <i>PEX26</i>    | chr22:18567998  | G/C     | -/+       | -         | -         | +/+       | -         | -/+       | -/+        | -/+       | -           | +/+         | +/+         |
| <i>QSER1</i>    | chr11:32953759  | A/G     | +/+       | -         | -         | +/+       | -         | -/+       | -/+        | -/+       | -           | -/+         | -/+         |
| <i>HSPG2</i>    | chr1:22157748   | C/G     | +/+       | -         | -         | -/+       | -         | -/+       | -/+        | -/+       | -           | +/+         | +/+         |
| <i>FCHSD1</i>   | chr5:141024648  | G/A     | -/+       | -         | -         | +/+       | -         | -/+       | -/+        | -/+       | -           | +/+         | +/+         |
| <i>FAM160A1</i> | chr4:152559873  | A/T     | -/+       | -         | -         | +/+       | -         | -/+       | +/+        | -/+       | -           | +/+         | +/+         |
| <i>PIEZO2</i>   | chr18:10677856  | C/T     | -/+       | -/+       | -/+       | -/+       | -/+       | -/+       | -/+        | -/+       | -           | -/+         | -/+         |
| <i>BCR</i>      | chr22:23524386  | C/G     | -/+       | +/+       | -/-       | -/+       | +/+       | -/+       | -/+        | -/+       | -           | +/+         | +/+         |
| <i>ATR</i>      | chr3:142268341  | C>T     | -         | -         | -         | -         | -         | +/+       | +/+        | +/+       | -           | +/+         | +/+         |
| <i>RSC1A1</i>   | chr1:15986365   | T>C     | -         | -         | -         | -         | -         | +/+       | +/+        | +/+       | -           | +/+         | +/+         |
| <i>TERT</i>     | chr5:1294163    | G>A     | -         | -         | -         | -         | -         | +/+       | +/+        | +/+       | -           | +/+         | +/+         |
| <i>CUL9</i>     | chr6:43152097   | C>T     | -         | -         | -         | -         | -         | +/+       | +/+        | +/+       | -           | +/+         | +/+         |
| <i>SOC5</i>     | chr2:46985961   | A>C     | -         | -         | -         | -         | -         | +/+       | +/+        | +/+       | -           | +/+         | +/+         |
| <i>BRCA2</i>    | chr13:32913690  | C>T     | -         | -         | -         | -         | -         | +/+       | +/+        | +/+       | -           | +/+         | +/+         |
| <i>CLDN10</i>   | chr13:96212695  | G>A     | -         | -         | -         | -         | -         | +/+       | +/+        | +/+       | -           | +/+         | +/+         |
| <i>SHPRH</i>    | chr6:146269484  | delGAA  | -         | -         | -         | +/+       | -         | -/+       | -/+        | -/+       | -           | -/+         | +/+         |
| <i>NID2</i>     | chr14:52505546  | G>A     | -         | -         | -         | -         | -         | -/+       | -/-        | -/+       | -           | -/+         | +/+         |
| <i>FMO2</i>     | chr1:171173065  | C>T     | -/+       | -         | -         | +/+       | -         | -/+       | -/+        | -/+       | -           | -/+         | -/+         |
| <i>PRKAG3</i>   | chr2:219695056  | T>A     | -/-       | -/+       | -/+       | -/+       | -/+       | -/+       | -/+        | -/+       | -/-         | -/+         | -/+         |
| <i>ABCA12</i>   | chr2:215919360  | G>T     | -/-       | -/+       | -/+       | -/+       | -/+       | -/+       | -/+        | -/+       | -/-         | -/+         | -/+         |
| <i>CCDC108</i>  | chr2:219868816  | A>G     | -/-       | -/+       | -/+       | -/+       | -/+       | -/+       | -/+        | -/+       | -/-         | -/+         | -/+         |
| <i>NDST4</i>    | chr4:115898360  | G>C     | -/+       | +/+       | -/+       | -/+       | +/+       | -/+       | -/+        | -/+       | -/+         | -/+         | +/+         |
| <i>CENPE</i>    | chr4:104030085  | G>A     | -/+       | -         | -         | -         | -         | -/+       | -/+        | -/+       | -/+         | -/+         | +/+         |
| <i>DCHS2</i>    | chr4:155163847  | T>A     | -/+       | -/+       | -         | +/+       | +/+       | -/+       | +/+        | -/+       | +/+         | -/+         | -/+         |
| <i>MDFI</i>     | chr6:41613864   | C>T     | -/+       | -         | -         | -/+       | -         | -/+       | +/+        | -/+       | -           | -/+         | +/+         |
| <i>PRRG4</i>    | chr11:32874843  | T>A     | +/+       | +/+       | +/+       | +/+       | +/+       | -/+       | -/+        | -/+       | +/+         | -/+         | -/+         |
| <i>QSER1</i>    | chr11:32953759  | A>G     | +/+       | -         | -         | +/+       | -         | -/+       | -/+        | -/+       | -           | -/+         | -/+         |
| <i>TBX5</i>     | chr12:114793375 | G>A     | -/+       | -/+       | -/+       | -/+       | -/+       | -/+       | -/+        | -/+       | +/+         | -/+         | -/+         |
| <i>SPNS2</i>    | chr17:4402454   | G>T     | -/+       | -/+       | -/+       | -/+       | -/+       | -/+       | -/+        | -/+       | -/+         | -/+         | -/+         |
| <i>STK11IP</i>  | chr2:220470710  | G>A     | -/-       | -/+       | -/+       | -/+       | -/+       | -/+       | -/+        | -/+       | -/-         | -/+         | -/+         |
| <i>SMOC2</i>    | chr6:169064783  | A>G     | -/+       | -/-       | -/+       | -/-       | -/+       | -/-       | -/+        | -/-       | -/+         | -/+         | -/+         |
| <i>SLC26A7</i>  | chr8:92375732   | A>T     | -/+       | -         | -         | +/+       | -         | -/+       | -/+        | -/+       | +/+         | -/+         | -/+         |
| <i>HECW2</i>    | chr2:197183394  | G>C     | -/+       | -/-       | -/-       | -/-       | -/+       | -/-       | -/-        | -/+       | -/+         | -/+         | -/+         |
| <i>TP53I13</i>  | chr17:27899895  | C>T     | -/+       | -         | -         | -/-       | -         | -/+       | -/+        | -/+       | +/+         | -/+         | -/+         |
| <i>LOXL2</i>    | chr8:23225582   | G>A     | -/+       | -         | -         | +/+       | -         | -/+       | +/+        | -/+       | -/+         | -/+         | -/+         |

|                |                |       |     |     |     |     |     |     |     |     |     |     |     |
|----------------|----------------|-------|-----|-----|-----|-----|-----|-----|-----|-----|-----|-----|-----|
| <b>GPR124</b>  | chr8:37697775  | C>T   | -/+ | -   | -   | +/+ | -   | -/+ | +/+ | -/+ | -/+ | -/+ | -/+ |
| <b>EFCAB5</b>  | chr17:28380799 | delAG | -/+ | -   | -   |     | -   | -/+ | -/+ | -/+ | +/+ | -/+ | -/+ |
| <b>CBFA2T3</b> | chr16:88947694 | G>A   | -/+ | -   | -   | +/+ | -   | -/+ | -/+ | -/+ | +/+ | -/+ | -/+ |
| <b>SLC28A2</b> | chr15:45559861 | C>T   | -/+ | -   | -   | -/+ | -   | -/+ | +/+ | -/- | -/+ | -/+ | -/+ |
| <b>PPP6R2</b>  | chr22:50876272 | T>C   | -/+ | -   | -   | +/+ | -   | -/+ | -/+ | -/+ | -/+ | -/+ | +/+ |
| <b>CFAP65</b>  | chr2:219868816 | A>G   | -/- | -/+ | -/+ | -/+ | -/+ | -/+ | -/+ | -/+ | -/- | -/+ | -/+ |
| <b>MSRB3</b>   | chr12:65857067 | G>A   | -/+ | -   | -   | -/+ | -   | -/+ | -/+ | -/- | +/+ | -/+ | -/+ |
| <b>KIF24</b>   | chr9:34269296  | A>G   | -/+ | -   | -   | -/+ | -   | -/+ | -/+ | -/+ | +/+ | -/+ | -/+ |
| <b>FIGNL2</b>  | chr12:52214855 | A>G   | -/+ | -   | -   | -/+ | -   | -/+ | -/+ | -/- | +/+ | -/+ | -/+ |
| <b>SPAG5</b>   | chr17:26911215 | C>A   | -/+ | -   | -   | -/- | -   | -/+ | -/+ | -/+ | +/+ | -/+ | -/+ |

The family members' annotations are according to Figure 1. -/-: homozygote for the mutation; -/+: heterozygote, and +/+: normal. "A" represents affected PTC individuals, and "H" represents healthy individuals. Positions on chromosomes are according to GRCh37/hg19.

**Supplementary Table S3: The analysis of the protein-protein interactions (PPI) detected by the Biological General Repository for Interaction Datasets (BioGRID).**

| Protein                                                                                                                                                                                                                                                                                                                                                                                                                                                                                                                                                                                                                                                                         | Interactor    | Organism   | Experimental Evidence                             | Reference |
|---------------------------------------------------------------------------------------------------------------------------------------------------------------------------------------------------------------------------------------------------------------------------------------------------------------------------------------------------------------------------------------------------------------------------------------------------------------------------------------------------------------------------------------------------------------------------------------------------------------------------------------------------------------------------------|---------------|------------|---------------------------------------------------|-----------|
| <b>ARHGEF28</b>                                                                                                                                                                                                                                                                                                                                                                                                                                                                                                                                                                                                                                                                 | <b>SQSTM1</b> | H. sapiens | Affinity Capture-Western                          | 11        |
| <b>ARHGEF28</b>                                                                                                                                                                                                                                                                                                                                                                                                                                                                                                                                                                                                                                                                 | <b>MYH9</b>   | H. sapiens | Proximity Label-MS                                | 12        |
| <b>SQSTM1</b>                                                                                                                                                                                                                                                                                                                                                                                                                                                                                                                                                                                                                                                                   | <b>TP53</b>   | H. sapiens | Affinity Capture-Western<br>Reconstituted Complex | 13–17     |
| <p><b>Affinity Capture-Western:</b> An interaction is inferred when a bait protein is affinity captured from cell extracts by either polyclonal antibody or epitope tag and the associated interaction partner identified by Western blot with a specific polyclonal antibody or second epitope tag. <b>Proximity Label-MS:</b> An interaction is inferred when a bait-enzyme fusion protein selectively modifies a vicinal protein with a diffusible reactive product, followed by affinity capture of the modified protein and identification by mass spectrometric methods. <b>Reconstituted Complex:</b> An interaction is detected between purified proteins in vitro.</p> |               |            |                                                   |           |

**Supplementary Table S4: The primers that were used for the PCR amplification.**

| Primers                                                                               | T <sub>m</sub> (c°) | Product size (bp) |
|---------------------------------------------------------------------------------------|---------------------|-------------------|
| HABP2-F (1): 5' CCCCAGAGAACTCACAGTCAT 3'<br>HABP2-R (1): 5' CTGGTGATATTGTGCAAATGCT 3' | 62                  | 646               |
| HABP2-F (2): 5' AGACTTGGGACCGCTTTCTT 3'<br>HABP2-R (2): 5' GTGCAGACAGTTGGGCAGT 3'     | 62                  | 492               |
| MSH6-F: 5' AACCGATGTTGCTTTTCTGTC 3'<br>MSH6-R: 5' CCATGCATGCCTTAAGAAAGA 3'            | 62                  | 355               |
| LATS1-F: 5' GTCCTTCGTGTGGGCTACAT 3'<br>LATS1-R: 5' GTCGAGGATCTTCGGTTGAC 3'            | 62                  | 224               |
| GNAS-F: 5' GGCAACCCAGAAAGATCC 3'<br>GNAS-R: 5' TCTGAGATGGATCTTGCGTCT 3'               | 63                  | 373               |
| ITGAX-F: 5' TCACTACTTCGTGGCGTGTC 3'<br>ITGAX-R: 5' GAAGGTGATCTGAGGAAAAGGA 3'          | 62                  | 328               |
| ATM-F: 5' CAGTGGAGGTAAACATTCATCAAG 3'<br>ATM-R: 5' GTCATGACCCACAGCAAACA 3'            | 63                  | 284               |
| F7-F: 5' CCAGATTCACCCAGTTCAC 3'<br>F7-R: 5' CACCACATGGTCAGTGAGGA 3'                   | 63                  | 364               |
| PEX26-F: 5' ACATCCCTGAAGCTGTGCTC 3'<br>PEX26-R: 5' GAGACTCCCTCCCCAGTAG 3'             | 63                  | 288               |
| QSER1-F: 5' CAACATACCGCTCAGCTCAA 3'<br>QSER1-R: 5' GGAGTGCTGTGAACCAGTCA 3'            | 62                  | 239               |
| HSPG2-F: 5' GAGCAGCGGCTTCATAG <sub>gt</sub> 3'<br>HSPG2-R: 5' GCCGAGAACATTCAGTACCC 3' | 62                  | 364               |
| FCHSD1-F: 5' GCCCCATATGAGGTCTGTTC 3'<br>FCHSD1-R: 5' CACCCCCATTACATACCTGAT 3'         | 62                  | 177               |
| FAM160A1-F: 5' CGTTCCAACATCTGAAGTAGAATG 3'<br>FAM160A1-R: 5' TTGGCGCCTTTTATAGCTTAT 3' | 61                  | 249               |
| FBXW10-F: 5' TGGGATCAAAACCGAGTCAT 3'<br>FBXW10-R: 5' TTCTTCCATGAGCTGCCTCT 3'          | 62                  | 265               |
| PIZO2-F: 5' CCAATGAAAACGTGGTGACA 3'<br>PIZO2-R: 5' CTGTGCTGTTGCCTGCTATC 3'            | 63                  | 220               |
| BCR-F: 5' CAACAGTCCTTCGACAGCAG 3'<br>BCR-R: 5' ACGTGGCGTGAGGAACTC 3'                  | 62                  | 177               |
| ATR-F: 5' GCTTCTGCTCTCATTCGAACTT 3'<br>ATR-R: 5' CACCCTCTTTCCTAGAAGAATGTT 3'          | 62                  | 229               |
| CLDN10-F: 5' CACTAACCATAGTGCTTTCCCTCT 3'<br>CLDN10-R: 5' GGAAATTCATGTCTCTTGGTTGA 3'   | 62                  | 199               |
| NR4A1-F: 5' TATATGTGCGGGGTCCTGGAA 3'<br>NR4A1-R: 5' TGCCTAATGCAGACATCACC 3'           | 62                  | 220               |
| CUL9-F: 5' ATTCCACCCCTCCATGTAT 3'<br>CUL9-R: 5' CCACACTCAGGACACTCCA 3'                | 62                  | 220               |

|                                                                                    |    |     |
|------------------------------------------------------------------------------------|----|-----|
| SOCS5-F: 5' GCACTGCCTTAGCTACCTTCA 3'<br>SOCS5-R: 5' CAGCATCCAATGAACTCTGG 3'        | 62 | 498 |
| TERT-F: 5' AGTGCCAGCCGAAGTCTG 3'<br>TERT-R: 5' GTACACCGGGGACAAGG 3'                | 63 | 297 |
| RSC1A1-F: 5' AACCCGAGTTTGAGGACCTT 3'<br>RSC1A1-R: 5' GAGCGAGCAAGACTCATAGGAT 3'     | 62 | 245 |
| BRCA2-F: 5' GTCCTGCAACTTGTTACACAAATCA 3'<br>BRCA2-R: 5' AGCTAGTCACAAGTTCCTCAACG 3' | 63 | 501 |
| SHPRH-F: 5' TGTGGCTTTTCCAGAATGAGA 3'<br>SHPRH-R: 5' AATTTTGCCTTACCAGCCTGT 3'       | 63 | 237 |
| NID2-F: 5' CTCTCTGACTTTTGGTGCAAT 3'<br>NID2-R: 5' GCATGGCACTAGGTAACCCTTA 3'        | 61 | 300 |
| STK11IP-F: 5' GGTCTTTCTGCTGCAACCTC 3'<br>STK11IP-R: 5' CTGATGCATTCCCATCTCAC 3'     | 62 | 218 |
| HECW2-F: 5' CGAAGGGTCGCAGGAATC 3'<br>HECW2-R: 5' CTCGAGCCAAGAGCCACAG 3'            | 65 | 293 |
| SLC26A7-F: 5' ATCCCCGAATATCCCAGAGA 3'<br>SLC26A7-R: 5' TGCTTTTGTCTGAATGCTGAA 3'    | 62 | 475 |
| SMOC2-F: 5' AGTGATGTGGACTCCTTCCTG 3'<br>SMOC2-R: 5' TTCTTGATTTCCTTGGAAGGT 3'       | 61 | 242 |
| FMO2-F: 5' CTAAACGGGACAATGCCCTA 3'<br>FMO2-R: 5' CAACTTTGCTCACCAACGAG 3'           | 62 | 300 |
| PRKAG3-F: 5' TGTGAGATGAATGGCGACAG 3'<br>PRKAG3-R: 5' GTTCCGCGAGTTCGTCATC 3'        | 63 | 387 |
| ABCA12-F: 5' CCCTGGAATCTGCCACATAA 3'<br>ABCA12-R: 5' TGTTCATAAGGCTTGTCTGA 3'       | 63 | 221 |
| CCDC108-F: 5' TTAATGCCAATCCTGCCTGT 3'<br>CCDC108-R: 5' CCTTCTCGTCCTGTTCTTGC 3'     | 62 | 364 |
| NDST4-F: 5' AGAGGCATCCCCAAACTTCA 3'<br>NDST4-R: 5' CAATCTGGAGAATCTATCTCTACCACT 3'  | 62 | 245 |
| CENPE-F: 5' GCATCTTTCCAATGAGGTCAA 3'<br>CENPE-R: 5' TAGCGAACTGGATGAGGTGA 3'        | 63 | 246 |
| DCHS2-F: 5' TTGATTGTCCAAGCCACAGA 3'<br>DCHS2-R: 5' AGTTTGCTTGGTTGTTGAGGA 3'        | 62 | 246 |
| MDFI-F: 5' GCTCACTCCCAGATTGTGGT 3'<br>MDFI-R: 5' GACGTCGAGGTCAGTGCTGT 3'           | 64 | 365 |
| PRRG4-F: 5' TCAAAGCTCTTGGTCTTTCCA 3'<br>PRRG4-R: 5' CCCGGCCTATCAAATAACAC 3'        | 62 | 460 |
| TBX5-F: 5' TGGACAGGCTACCCTACCAG 3'<br>TBX5-R: 5' CATCCAGCGACCTTGAGTG 3'            | 63 | 457 |
| SPNS2-F: 5' AGGAGGAGGAGGCGGACG 3'<br>SPNS2-R: 5' CGACAGCGTCTGCACCTC 3'             | 66 | 140 |
| TRIOBP-F: 5' CAATAGAGCCACACGAGACAA 3'<br>TRIOBP-R: 5' GTTGTCTCGTGCAGCTCTATTG 3'    | 62 | 238 |

|                                                                                   |    |     |
|-----------------------------------------------------------------------------------|----|-----|
| TP53I13-F: 5' ACACGGCTGCACAGAACTT 3'<br>TP53I13-R: 5' GTCCACGTGGCAGAGGTC 3'       | 63 | 378 |
| LOXL2-F: 5' CAACGTGGCCAAGATTGAG 3'<br>LOXL2-R: 5' GCACTCAGATCCAAAGCACA 3'         | 63 | 233 |
| GPR124-F: 5' GGAGGGTCCAGTCGTAGTCC 3'<br>GPR124-R: 5' CAGAAGCCCGCAAGATGT 3'        | 63 | 389 |
| EFCAB5-F: 5' AGGACAGCACAAAGGGTCAA 3'<br>EFCAB5-R: 5' GGTCCTTGTTCTGATTTTTGG 3'     | 62 | 237 |
| CBFA2T3-F: 5' GACGCCGAGGACACAAAG 3'<br>CBFA2T3-R: 5' GCCCGTGTTTTCTACAAAG 3'       | 63 | 239 |
| SLC24A4-F: 5' GGATGTCATCATGGGCATTAC 3'<br>SLC24A4-R: 5' CTCCACAGCAGGACTTGACA 3'   | 62 | 208 |
| SLC28A2-F: 5' TGGGAGCCTTCATAGCCTTT 3'<br>SLC28A2-R: 5' GCTTTACCCCTCCTCACTC 3'     | 63 | 229 |
| PPP6R2-F: 5' GGGAGTGCCGTCTGATGT 3'<br>PPP6R2-R: 5' ACAGGCCCATGACAGACC 3'          | 63 | 298 |
| TMX4-F: 5' TCTGATTCCAGCATCTTACA 3'<br>TMX4-R: 5' GAAAGCAGTCTCAAACAAGCAA 3'        | 62 | 264 |
| TBX5-F: 5' GTGTGGGCCTCAGACTGG 3'<br>TBX5-R: 5' GCGACCTTGAGTGCAGATGT 3'            | 64 | 297 |
| CFAP65-F: 5' TTAATGCCAATCCTGCCTGT 3'<br>CFAP65-R: 5' CCTTCTCGTCCTGTTCTTGC 3'      | 62 | 364 |
| MSRB3-F: 5' CATGCTTTTCCCTGACGTTT 3'<br>MSRB3-R: 5' CACTTTGTTTCCATCACTCTCC 3'      | 62 | 232 |
| ARHGEF28-F: 5' CCTCTGCTCGGAAGGTTACTC 3'<br>ARHGEF28-R: 5' AGAACTCCCAACACAGTCCA 3' | 62 | 247 |
| KIF24-F: 5' CACTCCTGCTGTGTCTTTTCTC 3'<br>KIF24-R: 5' CAGTTGCTTTGCTGATTCCA 3'      | 62 | 233 |
| FIGNL2-F: 5' GACGAGCAAGATGGTGGACT 3'<br>FIGNL2-R: 5' CTCGCTGATGAGGAGTACGG 3'      | 63 | 343 |
| SLC47A1-F: 5' CATGGGGAGGTAATGACTGC 3'<br>SLC47A1-R: 5' CAGCAGATCATGTGCAGTTTC 3'   | 62 | 600 |
| SPAG5-F: 5' GCATCCAGGATTTAGGACCA 3'<br>SPAG5-R: 5' CCCTGGGTACAGAGGCTTTT 3'        | 62 | 268 |
| <b>T<sub>m</sub>, melting temperature. F, forward primer. R, reverse primer.</b>  |    |     |

## SUPPLEMENTARY REFERENCES

1. Sarquis, M.; Moraes, D.C.; Bastos-Rodrigues, L.; Azevedo, P.G.; Ramos, A.V.; Reis, F.V.; Dande, P.V.; Paim, I.; Friedman, E.; De Marco, L. Germline Mutations in Familial Papillary Thyroid Cancer. *Endocr. Pathol.* **2020**, *31*, 14–20. <https://doi.org/10.1007/s12022-020-09607-4>.
2. Hińcza, K.; Kowalik, A.; Kowalska, A. Current Knowledge of Germline Genetic Risk Factors for the Development of Non-Medullary Thyroid Cancer. *Genes* **2019**, *10*, 482. <https://doi.org/10.3390/genes10070482>.
3. Kandoth, C.; Schultz, N.; Cherniack, A.D.; Akbani, R.; Liu, Y.; Shen, H.; Levine, D.A. Integrated Genomic Characterization of Papillary Thyroid Carcinoma. *Cell* **2014**, *159*, 676–690. <https://doi.org/10.1016/j.cell.2014.09.050>.
4. Yang, S.P.; Ngeow, J. Familial non-medullary thyroid cancer: Unraveling the genetic maze. *Endocr. Relat. Cancer* **2016**, *23*, R577–R595. <https://doi.org/10.1530/erc-16-0067>.
5. Gara, S.K.; Jia, L.; Merino, M.J.; Agarwal, S.K.; Zhang, L.; Cam, M.; Patel, D.; Kebebew, E. Germline *HABP2* Mutation Causing Familial Nonmedullary Thyroid Cancer. *New Engl. J. Med.* **2015**, *373*, 448–455. <https://doi.org/10.1056/nejmoa1502449>.
6. Hwangbo, Y.; Lee, E.K.; Son, H.-Y.; Im, S.-W.; Kwak, S.-J.; Yoon, J.W.; Kim, M.J.; Kim, J.; Choi, H.S.; Ryu, C.H.; et al. Genome-Wide Association Study Reveals Distinct Genetic Susceptibility of Thyroid Nodules From Thyroid Cancer. *J. Clin. Endocrinol. Metab.* **2018**, *103*, 4384–4394. <https://doi.org/10.1210/jc.2017-02439>.
7. He, J.; Zhou, M.; Li, X.; Gu, S.; Cao, Y.; Xing, T.; Chen, W.; Chu, C.; Gu, F.; Zhou, J.; et al. *SLC34A2* simultaneously promotes papillary thyroid carcinoma growth and invasion through distinct mechanisms. *Oncogene* **2020**, *39*, 2658–2675. <https://doi.org/10.1038/s41388-020-1181-z>.
8. Marques, I.J.; Gomes, M.I.; Pojo, M.; Pires, M.C.; Moura, M.M.; Cabrera, R.; Santos, C.; van Ijcken, W.F.J.; Teixeira, M.R.; Ramalho, J.S.; et al. Identification of *SPRY4* as a Novel Candidate Susceptibility Gene for Familial Nonmedullary Thyroid Cancer. *Thyroid* **2021**, *31*, 1366–1375. <https://doi.org/10.1089/thy.2020.0290>.
9. Tomsic, J.; He, H.; Akagi, K.; Liyanarachchi, S.; Pan, Q.; Bertani, B.; Nagy, R.; Symer, D.E.; Blencowe, B.J.; de la Chapelle, A. A germline mutation in *SRRM2*, a splicing factor gene, is implicated in papillary thyroid carcinoma predisposition. *Sci. Rep.* **2015**, *5*, 10566. <https://doi.org/10.1038/srep10566>.
10. Zhao, Y.; Yu, T.; Sun, J.; Wang, F.; Cheng, C.; He, S.; Chen, L.; Xie, D.; Fu, L.; Guan, X.; et al. Germ-line mutations in *WDR77* predispose to familial papillary thyroid cancer. *Proc. Natl. Acad. Sci. USA* **2021**, *118*, e2026327118. <https://doi.org/10.1073/pnas.2026327118>.
11. Keller, B.A.; Volkening, K.; Droppelmann, C.A.; Ang, L.C.; Rademakers, R.; Strong, M.J. Co-aggregation of RNA binding proteins in ALS spinal motor neurons: Evidence of a common pathogenic mechanism. *Acta Neuropathol.* **2012**, *124*, 733–747. <https://doi.org/10.1007/s00401-012-1035-z>.
12. Fasci, D.; van Ingen, H.; Scheltema, R.A.; Heck, A.J.R. Histone Interaction Landscapes Visualized by Crosslinking Mass Spectrometry in Intact Cell Nuclei. *Mol. Cell Proteom.* **2018**, *17*, 2018–2033. <https://doi.org/10.1074/mcp.ra118.000924>.
13. Horikawa, I.; Fujita, K.; Jenkins, L.M.M.; Hiyoshi, Y.; Mondal, A.M.; Vojtesek, B.; Lane, D.P.; Appella, E.; Harris, C.C. Autophagic degradation of the inhibitory p53 isoform  $\Delta 133p53\alpha$  as a regulatory mechanism for p53-mediated senescence. *Nat. Commun.* **2014**, *5*, 4706. <https://doi.org/10.1038/ncomms5706>.
14. Kang, J.H.; Lee, J.-S.; Hong, D.; Lee, S.-H.; Kim, N.; Lee, W.-K.; Sung, T.-W.; Gong, Y.-D.; Kim, S.-Y. Renal cell carcinoma escapes death by p53 depletion through transglutaminase 2-chaperoned autophagy. *Cell Death Dis.* **2016**, *7*, e2163. <https://doi.org/10.1038/cddis.2016.14>.
15. Mukherjee, S.; Maddalena, M.; Lü, Y.; Martinez, S.; Nataraj, N.B.; Noronha, A.; Oren, M. Cross-talk between mutant p53 and p62/SQSTM1 augments cancer cell migration by promoting the degradation of cell adhesion proteins. *Proc. Natl. Acad. Sci. USA* **2022**, *119*, e2119644119.
16. Yuan, F.; Sun, Q.; Zhang, S.; Ye, L.; Xu, Y.; Deng, G.; Xu, Z.; Zhang, S.; Liu, B.; Chen, Q. The dual role of p62 in ferroptosis of glioblastoma according to p53 status. *Cell Biosci.* **2022**, *12*, 20. <https://doi.org/10.1186/s13578-022-00764-z>.
17. Di Lello, P.; Jenkins LM, M.; Jones, T.N.; Nguyen, B.D.; Hara, T.; Yamaguchi, H.; Omichinski, J.G. Structure of the Tfb1/p53 Complex: Insights into the Interaction between the p62/Tfb1 Subunit of TFIIF and the Activation Domain of p53. *Mol. Cell* **2006**, *22*, 731–740.
